# Supplementary material for: Engineering a Vascularized Hypoxic Tumor Model for Therapeutic Assessment
Source: MDPI journal article supplement (doi:10.3390/cells10092201), 2021-08-26
Supplement: s1 [file s1]

## **Supplemental Materials**

### **Engineering a Vascularized Hypoxic Tumor Model for Therapeutic Assessment**

Yuta Ando<sup>1</sup>, Jeong Min Oh<sup>1</sup>, Winfield Zhao<sup>1</sup>, Madeleine Tran<sup>1</sup>, Keyue Shen<sup>1,2,3\*</sup>

<sup>1</sup>Department of Biomedical Engineering, Viterbi School of Engineering, University of Southern California, Los Angeles, CA 90089

<sup>2</sup>Norris Comprehensive Cancer Center, Keck School of Medicine, University of Southern California, Los Angeles, CA 90033

<sup>3</sup>USC Stem Cell, Keck School of Medicine, University of Southern California, Los Angeles, CA 90033

\*Correspondence should be addressed to Keyue Shen (keyue.shen@usc.edu)

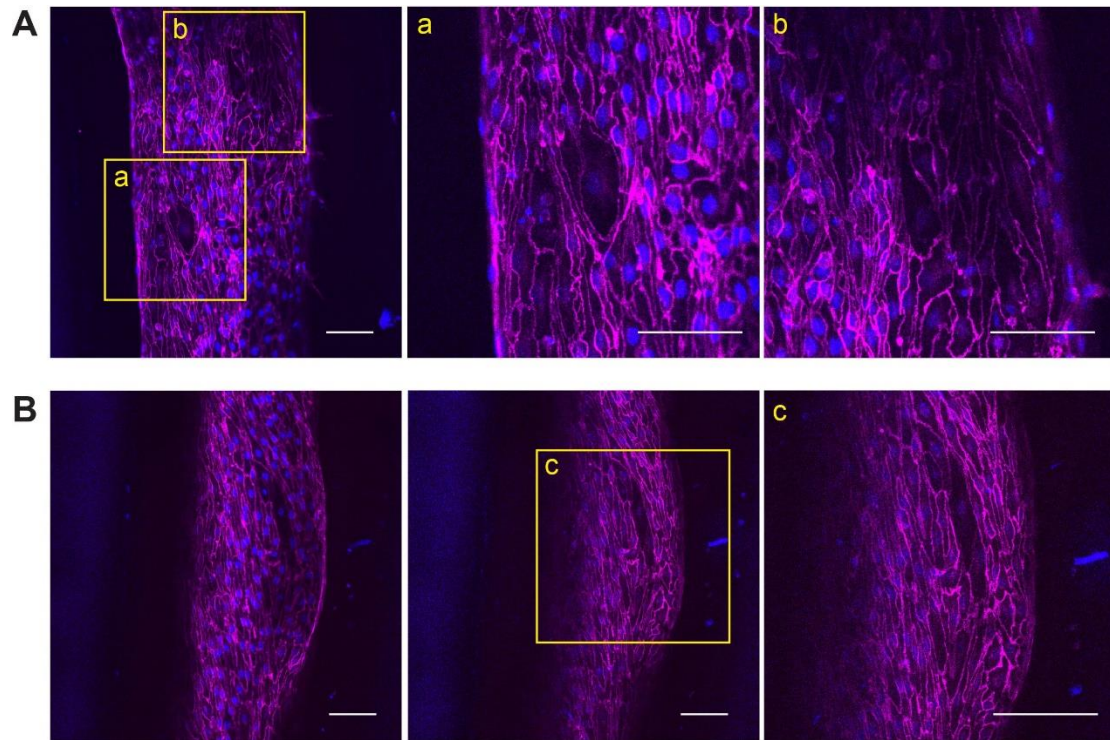

**Supplemental Figure S1.** Vascular integrity in endothelial layer. Purple: VE-cadherin; Blue: nuclei. (A) A confocal image taken near the imaging plane of Fig. 3A, and enlargement in the areas a and b. (B) Confocal images taken at (left) and near (middle) the imaging plane of Fig. 3B and enlargement in the area c. All images show a continuous layer of endothelium on the vascular wall. Scale bars: 50  $\mu\text{m}$ .

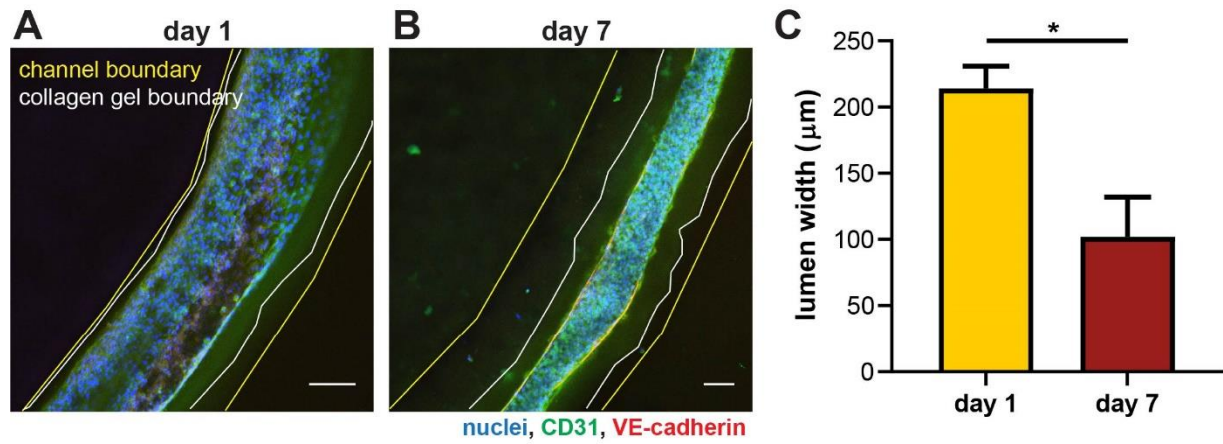

**Supplemental Figure S2.** Compaction of vasculature without PDA or fibronectin lining in microfluidic channel. Vascular morphology/size on (A) day 1 and (B) day 7. (C) Quantitative comparison of the lumen width. Scale bars: 100 μm. \*:  $p < 0.05$  by *t*-test.
